# Supplementary material for: Development of camelid single chain antibodies against Shiga toxin type 2 (Stx2) with therapeutic potential against Hemolytic Uremic Syndrome (HUS)
Source: PubMed Central journal article supplement (PMC4847011; doi:10.1038/srep24913), 2016-04-27
Supplement: srep24913-s1.pdf [file srep24913-s1.pdf]

## Development of camelid single chain antibodies against Shiga toxin type 2 (Stx2) with therapeutic potential against Hemolytic Uremic Syndrome (HUS)

Maria P. Mejías; Yanina Hiriart; Constanza Lauché; Romina J. Fernández-Brando; Romina Pardo; Andrea Bruballa; María V. Ramos; Fernando A. Goldbaum; Marina S. Palermo; Vanesa Zylberman.

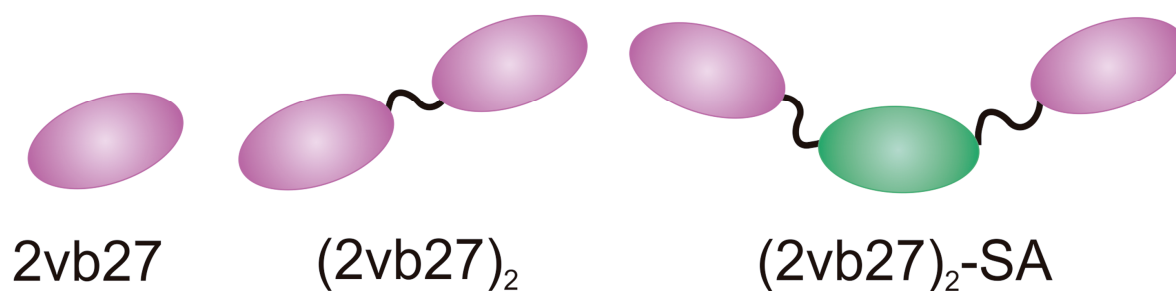

**Figure S1. Schematic representation of the different VHH 2vb27 formats.**

The selected Stx2B-specific VHH 2vb27 was converted into a bivalent and a trivalent format joining each VHH through the linker sequence (Gly4-Ser)<sub>3</sub>. Bivalent (2vb27)<sub>2</sub> consists of two copies of 2vb27 attached through a 15aa linker. Trivalent (2vb27)<sub>2</sub>-SA consists of two copies of VHH 2vb27 attached through a 15aa linker to a VHH with affinity for human and mouse serum albumin. VHH 2vb27 is magenta and anti-albumin VHH is green.

## Development of camelid single chain antibodies against Shiga toxin type 2 (Stx2) with therapeutic potential against Hemolytic Uremic Syndrome (HUS)

Maria P. Mejías; Yanina Hiriart; Constanza Lauché; Romina J. Fernández-Brando; Romina Pardo; Andrea Bruballa; María V. Ramos; Fernando A. Goldbaum; Marina S. Palermo; Vanesa Zylberman.

|          |       | FR1                        | CDR1         | FR2            | CDR2               | FR3                           | CDR3                 | FR4         |
|----------|-------|----------------------------|--------------|----------------|--------------------|-------------------------------|----------------------|-------------|
| Family 1 | 2VB27 | QVQLQESGGGLVQPGGSLKLAACAAS | GIT-FRNKAIG  | WYRQAPGKGRELVA | RIDSFDTT-DYADSVKG  | RFSISRDNKNTVYLMNSLKSEDTAVYYC  | NLRGSNY              | WGQGTQVTVSS |
| Family 2 | 2VB23 | QVQLQESGGGLVQAGGSLRLSCTAS  | GSI-FNTATMA  | WSRQAPGKQRELVA | SITQGRIT-YPVDSVKG  | RFTLSRDNSKNTVYLMNSLEPEDTAVYYC | GVDTIPTSRPRY         | WGQGTQVTVSS |
| Family 3 | 2VB43 | QVQLQESGGGLVQAGGSLRLSCAAS  | ENP-SSISTMA  | WYRQAPGKQRELVA | RIITGGYT-NYLD SVMG | RFTISRGNRESTAYLMNSLKPEDTAVYIC | NARTWSSADY           | WGQGTQVTVSS |
| Family 4 | 1VB42 | QVQLQESGGGLVQAGGSLRLSCAVS  | GRTGNIYAAMG  | WFRQAPGKQREFVS | ADSWNAGTTDYADSVKG  | RFTISRDNKSTVYLMNSLKPEDTAVYYC  | AAKIGLYDTSRGRFENEYDY | WGQGTQVTVSS |
| Family 5 | 1VB23 | QVQLQESGGGLAQAGGSLRLSCAAS  | GFD-FDYAIAIG | WFRQAPGKEREVVA | CITDSDGSTIYADSVRG  | RFTITADNAENTVYLMNSLKPEDTAEYFC | AAECFACSGYACHS       | WGRGTQVTVSS |
| Family 6 | 2VB20 | QVQLQESGGGLVQPGGSLRLSCAAS  | GFT-IDYYAIA  | WFRQAPGEEREVVS | CIRSGDGSTWYVDSVKG  | RFSISSDNKNAVYLMNSLKPEDTAVYYC  | AASRGSPYCPAVIDYDY    | WGQGTQVTVSS |
| Family 7 | 2VB6  | QVQLQESGGGLVQPGGSLRLSCAAS  | GII-FRSKSVG  | WYRQAPGTQREWVA | YIS-GDDSTNYEDFVKG  | RFTISRDNKNTVYLMNSVLPEDTAIYYC  | AADYRDYDELLLPVPPPYDY | WGQGTQVTVSS |

**Table S1: Amino acid sequences from a representative clon from each VHH family.**

Clones with Stx2-binding capacity were sequenced and grouped into 7 families based on amino acid composition and length of the CDR3. Sequences show all the regions of the antibody structure. Framework regions (FR1 through FR4) maintain the tertiary structure of the paratope while the three complementarity determining regions (CDR1 through CDR3) form the hypervariable loops that directly interact with the epitope of the antigen.
